# Supplementary material
Source: publisher figshare collection journal article supplement (https://acs.figshare.com/ndownloader/files/5108362)
Supplement: Supplementary file 1 [file 5108362]

Supporting Information

REACTIONS OF SF<sub>6</sub> WITH ORGANOTITANIUM AND ORGANOZIRCONIUM  
COMPLEXES: THE “INERT” SF<sub>6</sub> AS A REACTIVE FLUORINATING AGENT

Rehan Basta, Benjamin G. Harvey, Atta M. Arif, and Richard D. Ernst\*

Department of Chemistry, University of Utah, 315 S. 1400 E., Salt Lake City, Utah 84112-0850

## Experimental

All reactions were carried out with rigorous exclusion of air in Schlenk apparatus. Solvents were dried using activated alumina under nitrogen. Elemental analyses were obtained from Desert Analytics. Initial reactions used SF<sub>6</sub> (99.8%) obtained from Matheson Gas Products, while subsequently SF<sub>6</sub> (99.9%) was obtained from Praxair. The absence of significant amounts of SF<sub>4</sub> or other lower fluorides was established through aqueous acid/base titrations of the SF<sub>6</sub> with standardized base solutions, and also by F-19 NMR. The magnetic susceptibility measurement was carried out using a Quantum Design MPMS<sub>2</sub> magnetometer.

(Trimethylphosphine)(1,3-di-*t*-butylcyclopentadienyl)(6,6-dimethylcyclohexadienyl)titanium, Ti[1,3-(*t*-Bu)<sub>2</sub>C<sub>5</sub>H<sub>3</sub>](6,6-dmch)(PMe<sub>3</sub>).

A reaction mixture consisting of Ti[1,3-(*t*-Bu)<sub>2</sub>C<sub>5</sub>H<sub>3</sub>]Cl<sub>3</sub> (2.30 g, 6.84 mmol) and Zn (0.90 g, 14 mmol) in 26 mL THF was allowed to stir overnight, resulting in a dark green solution. The following day, PMe<sub>3</sub> (0.85 mL, 8.2 mmol) was added and the mixture was stirred for 2 h. K(6,6-dmch) (3.00 g, 20.5 mmol) in 30 mL THF was added dropwise via a pressure equalizing addition funnel at -78° C. The reaction mixture turned dark brown and was slowly warmed to room temperature, and thereafter allowed to stir for 2 h. Next, the solvent was removed in vacuo to give a dark brown solid. Extraction of the solid with ca. 150 mL ether and filtration through a Celite pad on a medium frit gave a brown-orange filtrate. Concentration of the solution to ca. 10 mL and cooling to -60° C for 2 days gave 1.48 g (53%) of brown-orange solid. Single crystals suitable for a diffraction study were grown by slowly cooling concentrated solutions of the compound in hexane to -30°.

$^1\text{H}$  NMR (benzene- $\text{d}_6$ , ambient):  $\delta$  -0.33 (s, 3H, exo  $\text{CH}_3$ ), 0.36 (d, 9H,  $J = 4.2$  Hz,  $\text{PMe}_3$ ), 0.73 (s, 18H,  $\text{C}(\text{CH}_3)_3$ ), 1.39 (s, 3H, endo  $\text{CH}_3$ ), 1.86 (d, 2H $_{1,5}$ ,  $J = 6$  Hz), 5.82 (t, 2H,  $J = 7.2$  Hz, Cp), 6.36 (d, 2H $_{2,4}$ ,  $J = 2.1$  Hz), 6.97 (t, 1H $_3$ ,  $J = 7.1$  Hz), 7.29 (t, 1H,  $J = 2.3$  Hz, Cp).

$^{13}\text{C}$  NMR (benzene- $\text{d}_6$ , ambient):  $\delta$  4.35 (s, 1C $_6$ ), 19.28 (q, 3C,  $J = 124.6$  Hz,  $\text{PMe}_3$ ), 26.05 (q, 1C,  $J = 125.5$  Hz, exo  $\text{CH}_3$ ), 26.89 (q, 1C,  $J = 125.0$  Hz, endo  $\text{CH}_3$ ), 32.34 (s, 2C,  $(\text{CH}_3)_3\text{C}$ ), 32.60 (d of quintets, 6C,  $J = 125.1$ , 4.8 Hz,  $\text{C}(\text{CH}_3)_3$ ), 92.16 (dd, 2C $_{1,5}$ ,  $J = 163.0$ , 7.9 Hz), 96.10 (d, 2C $_{2,4}$ ,  $J = 167.7$  Hz), 106.27 (dt, 2C,  $J = 169.5$ , 6.6 Hz, Cp), 108.31 (dt, 1C,  $J = 162.4$ , 7.2 Hz, Cp), 114.96 (dt, 1C $_3$ ,  $J = 158.1$ , 7.2 Hz), 131.21 (s, 2C, Cp).

Anal. Calc. for  $\text{C}_{24}\text{H}_{41}\text{PTi}$ : C, 70.58; H, 10.12. Found: C, 70.54; H, 10.28.

Difluoro(1,3-di-*t*-butylcyclopentadienyl)titanium tetramer,  $\{\text{Ti}[\text{1,3-(t-Bu)}_2\text{C}_5\text{H}_3]\text{F}_2\}_4$

An orange solution of  $\text{Ti}[\text{1,3-(t-Bu)}_2\text{C}_5\text{H}_3](6,6\text{-dmch})(\text{PMe}_3)$  (0.68 g, 1.66 mmol) in 10 mL toluene was prepared under a nitrogen atmosphere in a 200 mL flask, which was subsequently filled with  $\text{SF}_6$  gas. The reaction mixture was allowed to stand at room temperature for 2 days. Green crystals precipitated out of solution, often of suitable quality for a diffraction study, and were washed with pentane and ether, affording 0.23 g of product (53%). No attempt was made to optimize the yield of this reaction, although there appeared to be only traces of other organotitanium products (very small amount of red crystals). When the quality of the initially deposited crystals was insufficient, higher quality crystals could be grown by slowly cooling hot solutions of the compound in toluene.

Anal. Calc. for  $\text{C}_{52}\text{H}_{84}\text{F}_8\text{Ti}_4$ : C, 59.31; H, 8.04. Found: C, 59.39; H, 7.74.

Magnetic Susceptibility:  $\mu = 1.74 \mu_{\text{B}}$  (per titanium).

## Structural Studies

Single crystals of the two compounds were mounted on a glass fiber with Paratone<sup>®</sup> oil, and transferred to a Nonius Kappa CCD autodiffractometer for unit cell determination and data collection. Initial structure solutions were obtained straightforwardly, and improved by subsequent difference Fourier and least-squares refinement methods. For the phosphine adduct two independent molecules were present in the asymmetric unit, which exhibited nearly identical structures. All nonhydrogen atoms were refined anisotropically. Hydrogen atoms on metal-bound carbon atoms were refined isotropically, while all others were placed in idealized positions. For the fluoride complex, two tetrameric units were found in the unit cell, each located on a center of inversion. Their nonhydrogen atoms were readily refined anisotropically, while the hydrogen atoms were refined isotropically. All other hydrogen atoms were placed in idealized locations. Although the solution based on this model appeared quite acceptable, a faint second image of each tetramer was observed, accounting for about 8% of the overall electron density (i.e., a ratio of 92:8), and related to the major images by a rotation of ca. 20° around the z axis. Their titanium and fluorine atoms were refined isotropically, while the metal-bound carbon atoms were refined as rigid groups. Most but not all of the other carbon atoms were refined isotropically, and most hydrogen atoms were included in idealized locations. Notably, the quaternary carbon atoms of the *t*-butyl groups overlapped for the two images.

Table S1. Crystallographic Data for  $\text{Ti}[1,3-(\text{t-Bu})_2\text{C}_5\text{H}_3](6,6\text{-dmch})(\text{PMe}_3)$  and  $\{\text{Ti}[1,3-(\text{t-Bu})_2\text{C}_5\text{H}_3]\text{F}_2\}_4$ .

|                               |                                                |                                                   |
|-------------------------------|------------------------------------------------|---------------------------------------------------|
| formula                       | $\text{C}_{24}\text{H}_{41}\text{PTi}$         | $\text{C}_{52}\text{H}_{84}\text{F}_8\text{Ti}_4$ |
| formula wt.                   | 408.44                                         | 1052.79                                           |
| crystal system                | monoclinic                                     | triclinic                                         |
| space group                   | $\underline{\text{P}}2_1/\underline{\text{n}}$ | $\underline{\text{P}}\bar{1}$                     |
| color                         | orange                                         | green                                             |
| a (Å)                         | 14.8106(3)                                     | 10.6523(2)                                        |
| b (Å)                         | 10.4950(3)                                     | 14.1425(2)                                        |
| c (Å)                         | 30.8449(10)                                    | 19.0644(3)                                        |
| $\alpha$ (deg)                | 90                                             | 90.7670(11)                                       |
| $\beta$ (deg)                 | 103.2967(16)                                   | 103.0287(8)                                       |
| $\gamma$ (deg)                | 90                                             | 92.0666(11)                                       |
| temp. (K)                     | 150(1)                                         | 150(1)                                            |
| Z                             | 8                                              | 2                                                 |
| R (2 $\sigma$ )               | 0.0502                                         | 0.0451                                            |
| wR <sup>2</sup> (2 $\sigma$ ) | 0.0982                                         | 0.0989                                            |
| GOF                           | 1.018                                          | 1.055                                             |

Table S2. Pertinent Bonding Parameters for Ti[1,3-C<sub>5</sub>H<sub>3</sub>(t-Bu)<sub>2</sub>](6,6-dmch)(PMe<sub>3</sub>).

| Bond Distances (Å) |           |                |           |         |           |           |          |
|--------------------|-----------|----------------|-----------|---------|-----------|-----------|----------|
| Ti1-C1             | 2.191(2)  | Ti1-C9         | 2.418(2)  | Ti2-C1A | 2.196(2)  | Ti2-C9A   | 2.413(2) |
| Ti1-C2             | 2.291(2)  | Ti1-C10        | 2.460(2)  | Ti2-C2A | 2.301(2)  | Ti2-C10A  | 2.468(2) |
| Ti1-C3             | 2.351(2)  | Ti1-C11        | 2.424(2)  | Ti2-C3A | 2.356(2)  | Ti2-C11A  | 2.445(2) |
| Ti1-C4             | 2.287(2)  | Ti1-C12        | 2.317(2)  | Ti2-C4A | 2.293(2)  | Ti2-C12A  | 2.325(2) |
| Ti1-C5             | 2.195(2)  | Ti1-C13        | 2.315(2)  | Ti2-C5A | 2.193(2)  | Ti2-C13A  | 2.307(2) |
| Ti1-P1             | 2.6499(7) | C9-C10         | 1.412(3)  | Ti2-P2  | 2.6481(7) | C9A-C10A  | 1.418(3) |
| C1-C2              | 1.419(3)  | C9-C13         | 1.417(3)  | C1A-C2A | 1.417(3)  | C9A-C13A  | 1.422(3) |
| C2-C3              | 1.408(3)  | C10-C11        | 1.414(3)  | C2A-C3A | 1.416(3)  | C10A-C11A | 1.414(3) |
| C3-C4              | 1.412(3)  | C11-C12        | 1.417(3)  | C3A-C4A | 1.401(3)  | C11A-C12A | 1.418(3) |
| C4-C5              | 1.421(3)  | C12-C13        | 1.418(3)  | C4A-C5A | 1.428(3)  | C12A-C13A | 1.422(3) |
| Bond Angles (Deg.) |           |                |           |         |           |           |          |
| C1-C2-C3           | 118.8(2)  | C1A-C2A-C3A    | 117.5(2)  |         |           |           |          |
| C2-C3-C4           | 121.6(2)  | C2A-C3A-C4A    | 122.1(2)  |         |           |           |          |
| C3-C4-C5           | 118.1(2)  | C3A-C4A-C5A    | 118.7(2)  |         |           |           |          |
| C4-C5-C6           | 115.6(2)  | C4A-C5A-C6A    | 114.0(2)  |         |           |           |          |
| C6-C1-C2           | 114.6(2)  | C6A-C1A-C2A    | 115.6(2)  |         |           |           |          |
| C9-C10-C11         | 110.5(2)  | C9A-C10A-C11A  | 110.9(2)  |         |           |           |          |
| C10-C11-C12        | 106.1(2)  | C10A-C11A-C12A | 106.1(2)  |         |           |           |          |
| C11-C12-C13        | 108.7(2)  | C11A-C12A-C13A | 108.7(2)  |         |           |           |          |
| C12-C13-C9         | 108.5(2)  | C12A-C13A-C9A  | 108.5(2)  |         |           |           |          |
| C13-C9-C10         | 106.3(2)  | C13A-C9A-C10A  | 105.8(2)  |         |           |           |          |
| Ti1-P1-C22         | 117.34(8) | Ti2-P2-C22A    | 114.77(9) |         |           |           |          |
| Ti1-P1-C23         | 115.21(9) | Ti2-P2-C23A    | 117.18(9) |         |           |           |          |
| Ti1-P1-C24         | 124.00(8) | Ti2-P2-C24A    | 124.48(9) |         |           |           |          |
| C1-C6-C5           | 103.9(2)  | C1A-C6A-C5A    | 103.9(2)  |         |           |           |          |

Table S3. Pertinent Bonding Parameters for  $\{\text{Ti}[\text{1,3-C}_5\text{H}_3(\text{t-Bu})_2\text{F}_2]\}_4$ .

| Bond Distances (Å) |          |         |          |           |         |           |         |
|--------------------|----------|---------|----------|-----------|---------|-----------|---------|
| Ti1-C1             | 2.370(2) | Ti3-C27 | 2.359(2) | Ti12-C1'  | 2.38(2) | Ti34-C27' | 2.37(3) |
| Ti1-C2             | 2.332(2) | Ti3-C28 | 2.330(2) | Ti12-C2'  | 2.37(3) | Ti34-C28' | 2.38(3) |
| Ti1-C3             | 2.361(2) | Ti3-C29 | 2.370(2) | Ti12-C3'  | 2.36(3) | Ti34-C29' | 2.36(3) |
| Ti1-C4             | 2.366(2) | Ti3-C30 | 2.374(2) | Ti12-C4'  | 2.36(2) | Ti34-C30' | 2.34(2) |
| Ti1-C5             | 2.367(2) | Ti3-C31 | 2.369(2) | Ti12-C5'  | 2.37(2) | Ti34-C31' | 2.35(2) |
| Ti2-C14            | 2.370(2) | Ti4-C40 | 2.371(2) | Ti21-C14' | 2.34(3) | Ti43-C40' | 2.37(2) |
| Ti2-C15            | 2.335(2) | Ti4-C41 | 2.335(2) | Ti21-C15' | 2.37(3) | Ti43-C41' | 2.35(2) |
| Ti2-C16            | 2.374(2) | Ti4-C42 | 2.370(2) | Ti21-C16' | 2.37(3) | Ti43-C42' | 2.33(3) |
| Ti2-C17            | 2.377(2) | Ti4-C43 | 2.369(2) | Ti21-C17' | 2.36(3) | Ti43-C43' | 2.35(2) |
| Ti2-C18            | 2.371(2) | Ti4-C44 | 2.369(2) | Ti21-C18' | 2.34(3) | Ti43-C44' | 2.38(2) |
| Ti1-F1             | 2.023(2) | Ti3-F5  | 2.010(2) | Ti12-F1'  | 2.06(2) | Ti34-F5'  | 2.01(2) |
| Ti1-F2             | 2.023(2) | Ti3-F6  | 2.019(2) | Ti12-F2'  | 2.09(2) | Ti34-F6'  | 1.96(2) |
| Ti1-F3             | 2.015(2) | Ti3-F7  | 2.022(2) | Ti12-F3'  | 1.99(3) | Ti34-F7'  | 2.00(2) |
| Ti1-F4             | 2.017(2) | Ti3-F8  | 2.012(2) | Ti12-F4'  | 2.00(3) | Ti34-F8'  | 2.03(3) |
| Ti2-F1             | 2.015(2) | Ti4-F5  | 2.022(2) | Ti21-F1'  | 2.01(2) | Ti43-F5'  | 2.03(2) |
| Ti2-F2             | 2.008(2) | Ti4-F6  | 2.020(2) | Ti21-F2'  | 1.96(2) | Ti43-F6'  | 2.06(2) |
| Ti2-F3             | 2.022(2) | Ti4-F7  | 2.016(2) | Ti21-F3'  | 2.02(3) | Ti43-F7'  | 2.02(2) |
| Ti2-F4             | 2.018(2) | Ti4-F8  | 2.013(2) | Ti21-F4'  | 2.05(3) | Ti43-F8'  | 1.99(3) |
| C1-C2              | 1.427(3) | C27-C28 | 1.424(3) | C1'-C2'   | 1.420   | C27'-C28' | 1.420   |
| C1-C5              | 1.410(3) | C27-C31 | 1.412(4) | C1'-C5'   | 1.420   | C27'-C31' | 1.420   |

|         |          |         |          |           |       |           |       |
|---------|----------|---------|----------|-----------|-------|-----------|-------|
| C2-C3   | 1.418(3) | C28-C29 | 1.427(3) | C2'-C3'   | 1.420 | C28'-C29' | 1.420 |
| C3-C4   | 1.413(3) | C29-C30 | 1.417(3) | C3'-C4'   | 1.420 | C29'-C30' | 1.420 |
| C4-C5   | 1.409(4) | C30-C31 | 1.404(4) | C4'-C5'   | 1.420 | C30'-C31' | 1.420 |
| C14-C15 | 1.429(3) | C40-C41 | 1.425(3) | C14'-C15' | 1.420 | C40'-C41' | 1.420 |
| C14-C18 | 1.416(3) | C40-C44 | 1.409(3) | C14'-C18' | 1.420 | C40'-C44' | 1.420 |
| C15-C16 | 1.429(3) | C41-C42 | 1.425(3) | C15'-C16' | 1.420 | C41'-C42' | 1.420 |
| C16-C17 | 1.413(3) | C42-C43 | 1.415(3) | C16'-C17' | 1.420 | C42'-C43' | 1.420 |
| C17-C18 | 1.412(4) | C43-C44 | 1.416(4) | C17'-C18' | 1.420 | C43'-C44' | 1.420 |

Bond Angles (Deg.)

|           |           |           |           |              |           |              |           |
|-----------|-----------|-----------|-----------|--------------|-----------|--------------|-----------|
| F1-Ti1-F2 | 71.19(7)  | F5-Ti3-F6 | 71.60(7)  | F1'-Ti12-F2' | 70.8(9)   | F5'-Ti34-F6' | 73.3(9)   |
| F1-Ti1-F3 | 83.04(8)  | F5-Ti3-F7 | 82.49(8)  | F1'-Ti12-F3' | 80.5(10)  | F5'-Ti34-F7' | 124.8(9)  |
| F1-Ti1-F4 | 124.10(8) | F5-Ti3-F8 | 123.02(8) | F1'-Ti12-F4' | 123.7(10) | F5'-Ti34-F8' | 82.0(10)  |
| F2-Ti1-F3 | 123.85(8) | F6-Ti3-F7 | 124.10(8) | F2'-Ti12-F3' | 121.2(10) | F6'-Ti34-F7' | 83.8(9)   |
| F2-Ti1-F4 | 82.96(8)  | F6-Ti3-F8 | 82.69(8)  | F2'-Ti12-F4' | 82.1(10)  | F6'-Ti34-F8' | 125.0(10) |
| F3-Ti1-F4 | 71.57(7)  | F7-Ti3-F8 | 71.28(7)  | F3'-Ti12-F4' | 72.9(11)  | F7'-Ti34-F8' | 71.3(10)  |
| F1-Ti2-F2 | 71.65(7)  | F5-Ti4-F6 | 71.34(7)  | F1'-Ti21-F2' | 74.4(10)  | F5'-Ti43-F6' | 70.8(9)   |
| F1-Ti2-F3 | 123.77(8) | F5-Ti4-F7 | 123.80(8) | F1'-Ti21-F3' | 121.9(10) | F5'-Ti43-F7' | 82.8(9)   |
| F1-Ti2-F4 | 82.68(8)  | F5-Ti4-F8 | 82.46(8)  | F1'-Ti21-F4' | 81.4(10)  | F5'-Ti43-F8' | 123.7(10) |
| F2-Ti2-F3 | 82.50(8)  | F6-Ti4-F7 | 83.35(8)  | F2'-Ti21-F3' | 80.0(10)  | F6'-Ti43-F7' | 124.4(9)  |
| F2-Ti2-F4 | 123.53(8) | F6-Ti4-F8 | 123.86(7) | F2'-Ti21-F4' | 123.8(10) | F6'-Ti43-F8' | 83.6(10)  |
| F3-Ti2-F4 | 71.40(7)  | F7-Ti4-F8 | 71.37(7)  | F3'-Ti21-F4' | 71.2(11)  | F7'-Ti43-F8' | 71.8(10)  |
